# Supplementary material for: Increased Throughput by Parallelization of Library Preparation for Massive Sequencing
Source: PubMed Central journal article supplement (PMC2850305; doi:10.1371/journal.pone.0010029), 2010-04-06
Supplement: pone.0010029.s001.pdf [file pone.0010029.s001.pdf]

|                                                               |                                                                             |  |  |  |
|---------------------------------------------------------------|-----------------------------------------------------------------------------|--|--|--|
| <b>MIDs Titanium</b>                                          |                                                                             |  |  |  |
| Each asterisk (*) indicates a phosphorothioate-modified base. |                                                                             |  |  |  |
| <b>Bold red italics indicates 4-base key sequence.</b>        |                                                                             |  |  |  |
| <b>TI = Titanium primer</b>                                   |                                                                             |  |  |  |
| Underline indicates MID sequence                              |                                                                             |  |  |  |
| <b>Adaptor B</b>                                              |                                                                             |  |  |  |
| <b>Primer TIB1:</b>                                           | 5'-5' BioTEG-C*C*T*A*TCCCCTGTGTGCCTGGCAGTC <b><i>*T*C*A*G</i></b> - 3'      |  |  |  |
| <b>Primer TIBprime1:</b>                                      | 5'- <b><i>C*T*G*A</i></b> *GACT*G*C*C*A- 3'                                 |  |  |  |
| <b>Adaptor TIMID 1</b>                                        |                                                                             |  |  |  |
| <b>TIMID 1</b>                                                | 5' - C*C*A*T*CTCATCCCTGCGTGTCTCCGACT <b><i>TCAG</i></b> ACGAGT*G*C*G*T - 3' |  |  |  |
| <b>TIMID1 prime:</b>                                          | 5'-A*C*G*C*ACTCGT <b><i>CTGAG</i></b> TTCG*G*A*G*A-3'                       |  |  |  |
| <b>Adaptor TIMID 2</b>                                        |                                                                             |  |  |  |
| <b>TIMID 2:</b>                                               | 5' - C*C*A*T*CTCATCCCTGCGTGTCTCCGACT <b><i>TCAG</i></b> ACGCTC*G*A*C*A - 3' |  |  |  |
| <b>TIMID 2 prime:</b>                                         | 5'-T*G*T*C*GAGCGA <b><i>CTGAG</i></b> TTCG*G*A*G*A-3'                       |  |  |  |
| <b>Adaptor TIMID 3</b>                                        |                                                                             |  |  |  |
| <b>TIMID 3:</b>                                               | 5' - C*C*A*T*CTCATCCCTGCGTGTCTCCGACT <b><i>TCAG</i></b> AGACGC*A*C*T*C - 3' |  |  |  |
| <b>TIMID3 prime:</b>                                          | 5'-G*A*G*T*GCGTCT <b><i>CTGAG</i></b> TTCG*G*A*G*A-3'                       |  |  |  |
| <b>Adaptor TIMID 4</b>                                        |                                                                             |  |  |  |
| <b>TIMID 4:</b>                                               | 5' - C*C*A*T*CTCATCCCTGCGTGTCTCCGACT <b><i>TCAG</i></b> AGCACT*G*T*A*G- 3'  |  |  |  |
| <b>TIMID4 prime:</b>                                          | 5'-C*T*A*C*AGTGCT <b><i>CTGAG</i></b> TTCG*G*A*G*A-3'                       |  |  |  |
| <b>Adaptor TIMID 5</b>                                        |                                                                             |  |  |  |
| <b>TIMID 5:</b>                                               | 5' - C*C*A*T*CTCATCCCTGCGTGTCTCCGACT <b><i>TCAG</i></b> ATCAGA*C*A*C*G- 3'  |  |  |  |
| <b>TIMID5 prime:</b>                                          | 5'-C*G*T*G*TCTGAT <b><i>CTGAG</i></b> TTCG*G*A*G*A-3'                       |  |  |  |
| <b>Adaptor TIMID 6</b>                                        |                                                                             |  |  |  |
| <b>TIMID 6:</b>                                               | 5' - C*C*A*T*CTCATCCCTGCGTGTCTCCGACT <b><i>TCAG</i></b> ATATCG*C*G*A*G- 3'  |  |  |  |
| <b>TIMID6 prime:</b>                                          | 5'-C*T*C*G*CGATAT <b><i>CTGAG</i></b> TTCG*G*A*G*A-3'                       |  |  |  |
| <b>Adaptor TIMID 7</b>                                        |                                                                             |  |  |  |
| <b>TIMID 7:</b>                                               | 5' - C*C*A*T*CTCATCCCTGCGTGTCTCCGACT <b><i>TCAG</i></b> CGTGTC*T*C*T*A- 3'  |  |  |  |
| <b>TIMID7 prime:</b>                                          | 5'-T*A*G*A*GACACG <b><i>CTGAG</i></b> TTCG*G*A*G*A-3'                       |  |  |  |
| <b>Adaptor TIMID 8</b>                                        |                                                                             |  |  |  |
| <b>TIMID 8:</b>                                               | 5' - C*C*A*T*CTCATCCCTGCGTGTCTCCGACT <b><i>TCAG</i></b> CTCGCG*T*G*T*C- 3'  |  |  |  |
| <b>TIMID8 prime:</b>                                          | 5'-G*A*C*A*CGCGAG <b><i>CTGAG</i></b> TTCG*G*A*G*A-3'                       |  |  |  |
| <b>Adaptor TIMID 9</b>                                        |                                                                             |  |  |  |
| <b>TIMID 9:</b>                                               | 5' - C*C*A*T*CTCATCCCTGCGTGTCTCCGACT <b><i>TCAG</i></b> TAGTAT*C*A*G*C- 3'  |  |  |  |
| <b>TIMID9 prime:</b>                                          | 5'-G*C*T*G*ATACTA <b><i>CTGAG</i></b> TTCG*G*A*G*A-3'                       |  |  |  |
| <b>Adaptor TIMID 10</b>                                       |                                                                             |  |  |  |
| <b>TIMID 10:</b>                                              | 5' - C*C*A*T*CTCATCCCTGCGTGTCTCCGACT <b><i>TCAG</i></b> TCTCTA*T*G*C*G- 3'  |  |  |  |
| <b>TIMID10 prime:</b>                                         | 5'-C*G*C*A*TAGAGA <b><i>CTGAG</i></b> TTCG*G*A*G*A-3'                       |  |  |  |
| <b>Adaptor TIMID 11</b>                                       |                                                                             |  |  |  |
| <b>TIMID 11:</b>                                              | 5' - C*C*A*T*CTCATCCCTGCGTGTCTCCGACT <b><i>TCAG</i></b> TGATAC*G*T*C*T- 3'  |  |  |  |
| <b>TIMID11 prime:</b>                                         | 5'-A*G*A*C*GTATCA <b><i>CTGAG</i></b> TTCG*G*A*G*A-3'                       |  |  |  |
| <b>Adaptor TIMID 12</b>                                       |                                                                             |  |  |  |
| <b>TIMID 12:</b>                                              | 5' - C*C*A*T*CTCATCCCTGCGTGTCTCCGACT <b><i>TCAG</i></b> TACTGA*G*C*T*A 3'   |  |  |  |
| <b>TIMID12 prime:</b>                                         | 5'-T*A*G*C*TCAGTA <b><i>CTGAG</i></b> TTCG*G*A*G*A-3'                       |  |  |  |
